# Supplementary material for: A critical role of amphiphilic polymers in organic–inorganic hybrid sol–gel derived gate dielectrics for flexible organic thin-film transistors
Source: Royal Society of Chemistry journal article supplement (doi:10.1039/c8tc06625f), 2019-01-01
Supplement: c8tc06625f1.pdf [file c8tc06625f1.pdf]

## Supporting Information for

# A Critical Role of Amphiphilic Polymers in Organic-Inorganic Hybrid Sol-Gel Derived Gate Dielectrics for Flexible Organic Thin-Film Transistors

*Yonghwa Baek*<sup>2,†</sup>, *Xinlin Li*,<sup>1,†</sup> *Nahae Kim*<sup>3,†</sup>, *Chan Eon Park*<sup>2</sup>, *Tae Kyu An*<sup>4\*</sup>, *Juyoung Kim*<sup>3\*</sup>,  
*Se Hyun Kim*<sup>5\*</sup>

<sup>1</sup>College of Electromechanical Engineering, Qingdao University, Qingdao 266071, China

<sup>2</sup>Polymer Research Institute, Department of Chemical Engineering, Pohang University of Science and Technology (POSTECH), Pohang, Gyeongbuk, 37673, Republic of Korea

<sup>3</sup>Department of Advanced Materials Engineering, Kangwon National University, Samcheok 25923, Republic of Korea

<sup>4</sup>Department of Polymer Science and Engineering & IT Convergence, Korea National University of Transportation, 50 Daehak-Ro, Chungju, 27469, Republic of Korea

<sup>5</sup>School of Chemical Engineering, Yeungnam University, 280 Daehak-Ro, Gyeongsan, Gyeongbuk, 38541, Republic of Korea

† Equally contributed as first authors.

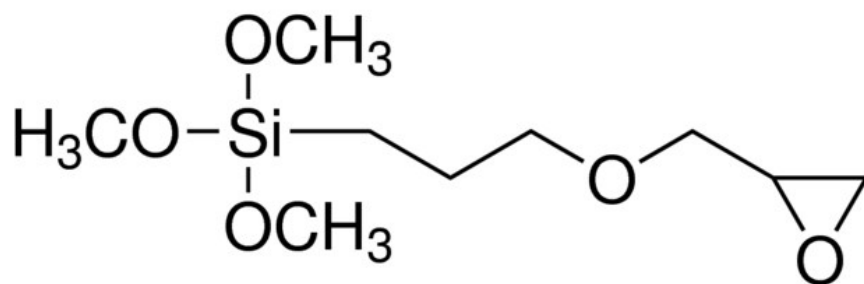

(3-glycidyloxypropyl)trimethoxysilane (GPTMS)

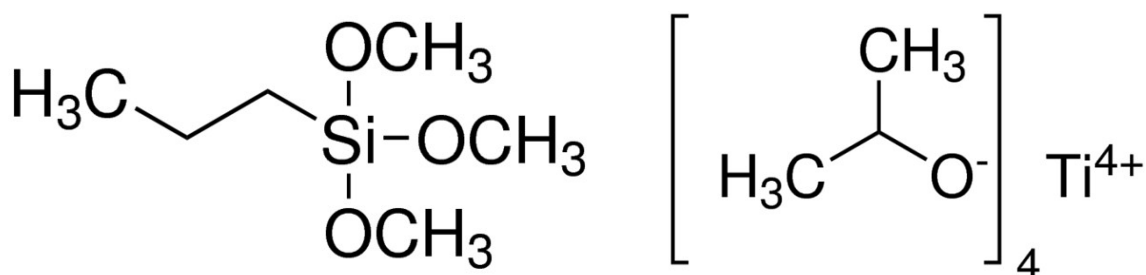

propyltrimethoxysilane (PTMS)

titanium(IV) isopropoxide (TTiP)

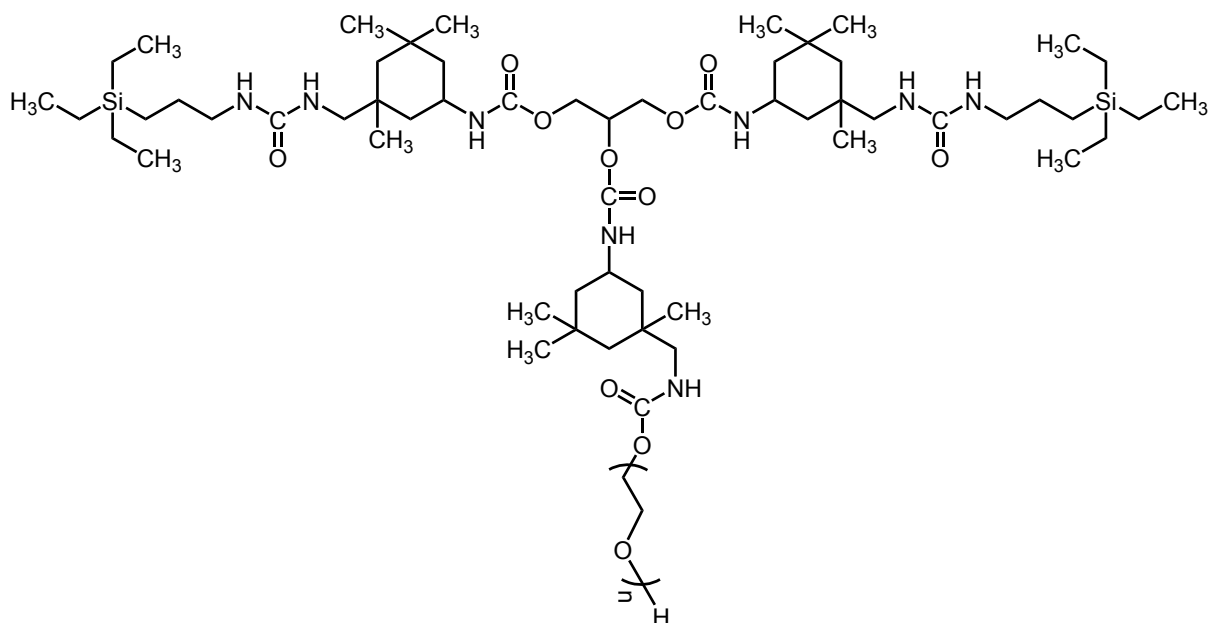

Alkoxysilane-Functionalized Amphiphilic Polymer (AFAP)

**Figure S1.** Chemical structures of (3-glycidyloxypropyl)trimethoxysilane (GPTMS), propyltrimethoxysilane (PTMS), titanium(IV) isopropoxide (TTiP), and alkoxysilane-functionalized amphiphilic polymer (AFAP).

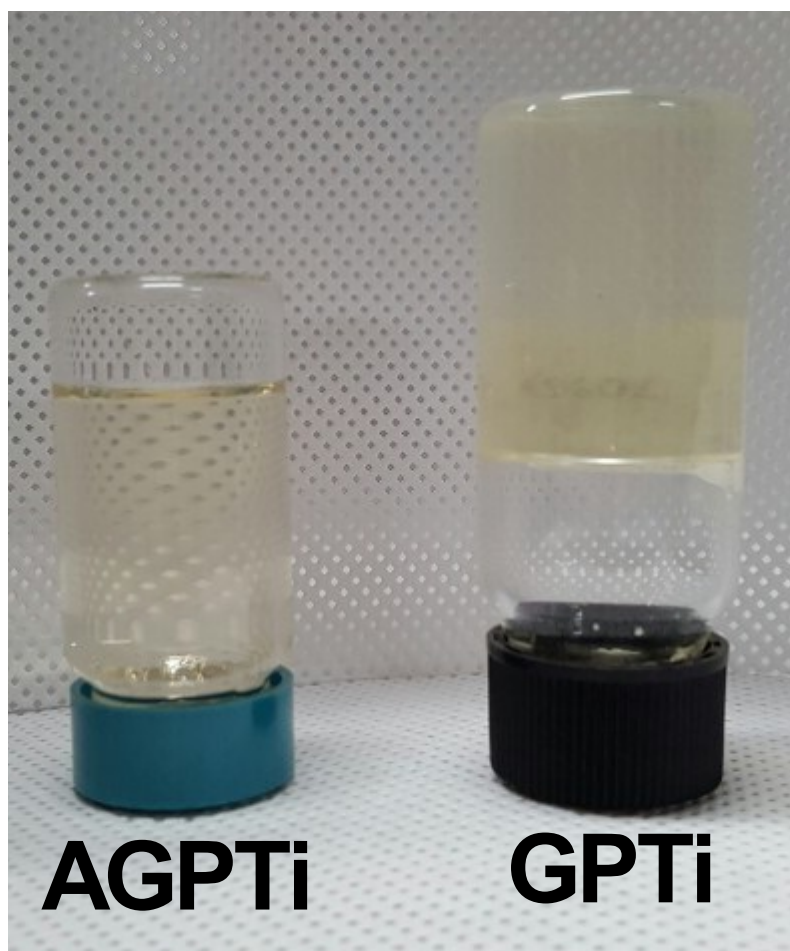

**Figure S2.** Photographs of AGPTi and GPTi sol solutions two months after they were prepared.

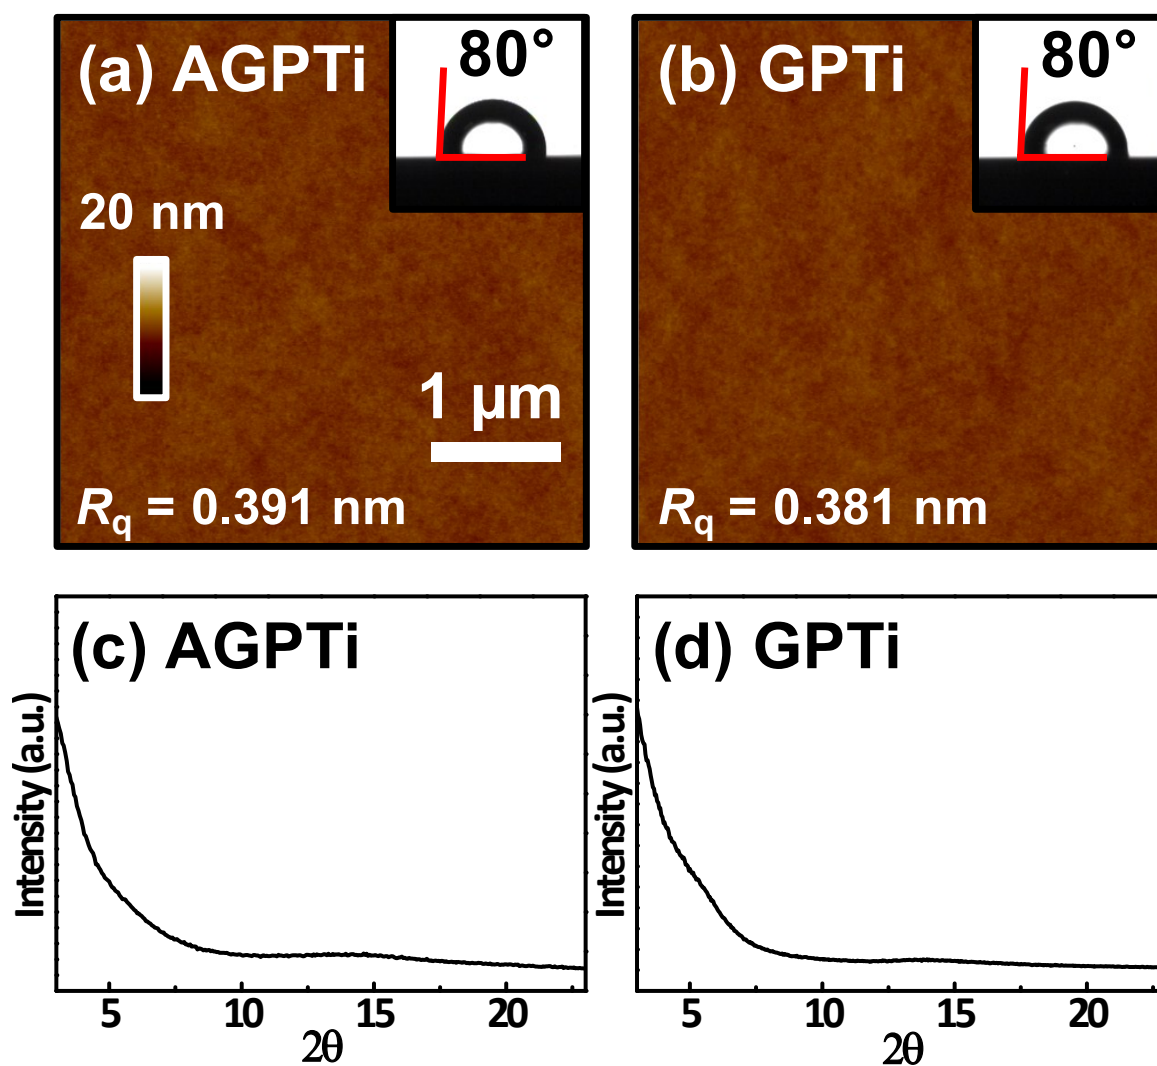

**Figure S3.** AFM images (a–b) and XRD analysis (c–d) of AGPTi (a and c) and GPTi (b and d). Insets: water contact angles of AGPTi and GPTi.

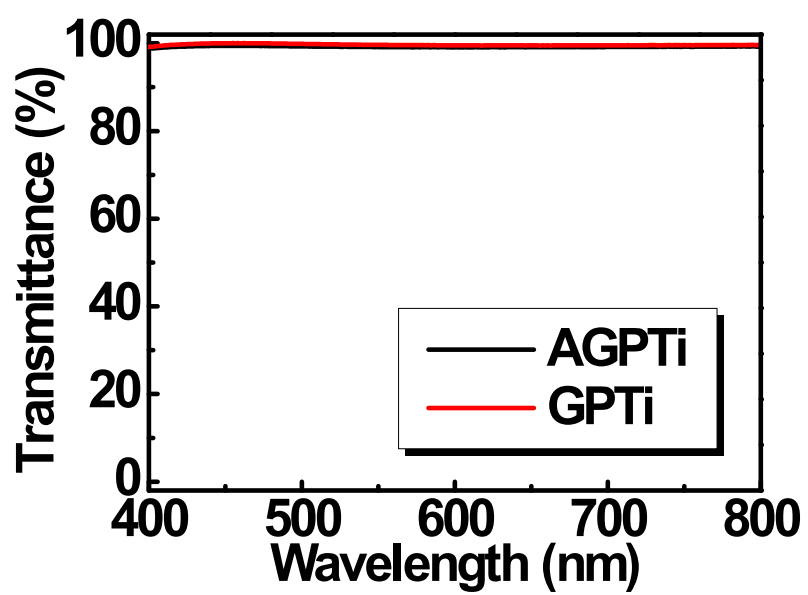

**Figure S4.** UV-visible spectra of AGPTi and GPTi films.

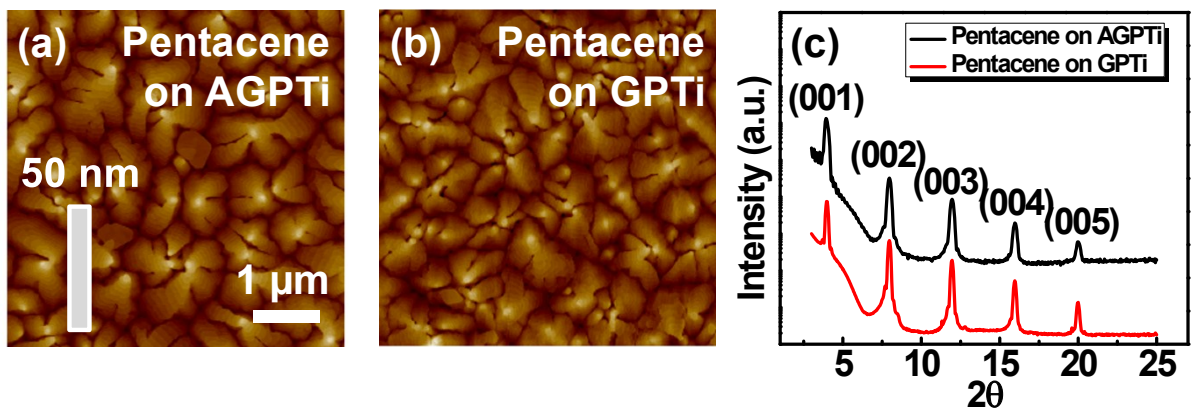

**Figure S5.** AFM images (a and b) and XRD analysis (c) of 50-nm-thick pentacene layers on AGPTi and GPTi films.

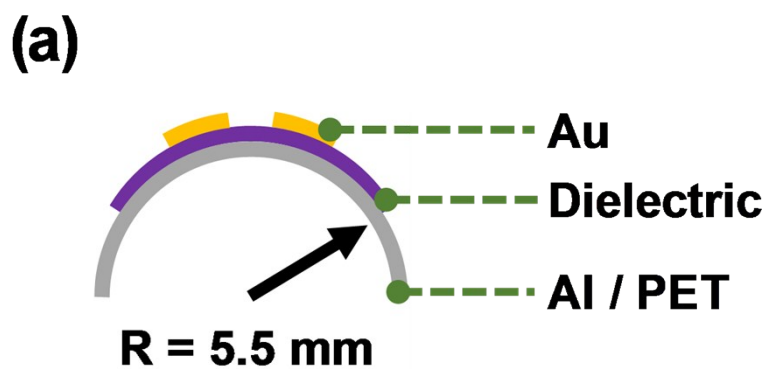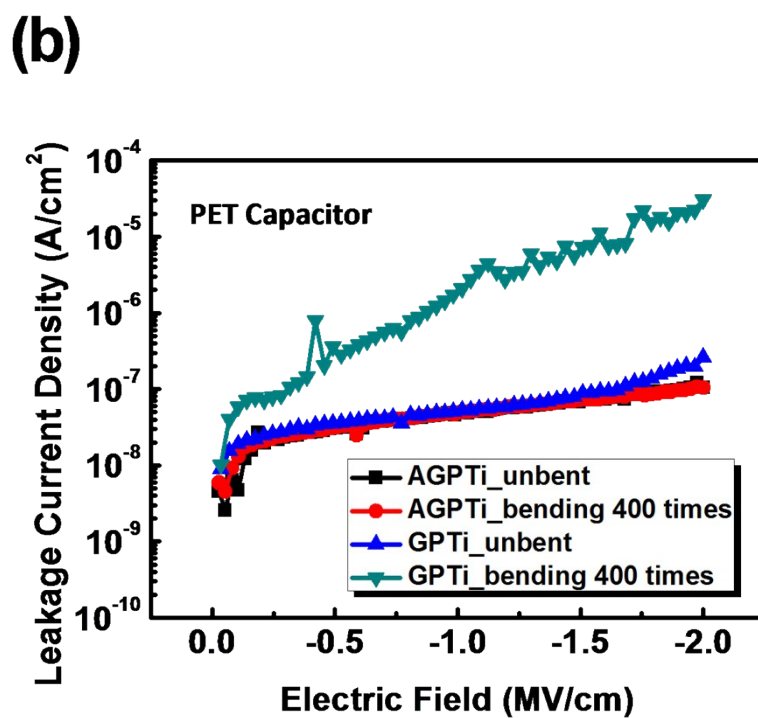

**Figure S6.** Scheme of flexible capacitors (a), and leakage current density levels of the flexible capacitors before/after bending (b).

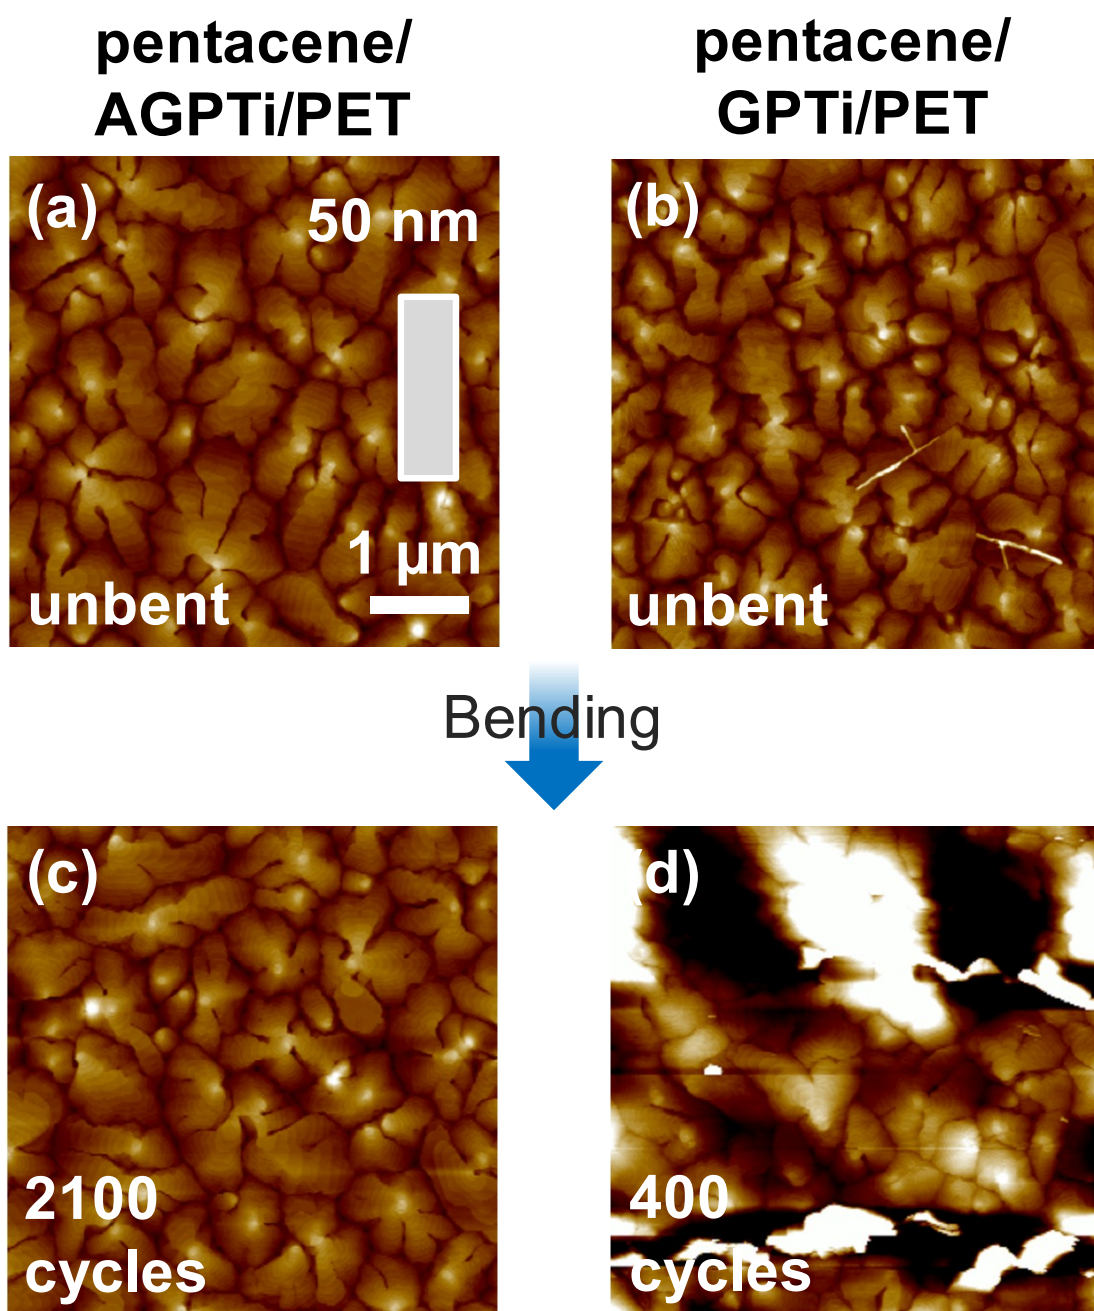

**Figure S7.** AFM images of 50-nm-thick pentacene layers on AGPTi (a and c) and GPTi (b and d)/PET films before (a and b)/after (c and d) bending.



**Table S1.** Water and diiodomethane contact angles of AGPTi and GPTi films, and their surface energy

| Gate dielectrics | Water contact angle<br>$\theta_{\text{water}}$ | Diiodomethane contact angle<br>$\theta_{\text{water}}$ | Surface energy<br>[mJ/m <sup>2</sup> ] |
|------------------|------------------------------------------------|--------------------------------------------------------|----------------------------------------|
| AGPTi            | 80°                                            | 40°                                                    | 40.07                                  |
| GPTi             | 80°                                            | 47°                                                    | 36.91                                  |
